# Supplementary material
Source: MDPI journal article supplement (https://www.mdpi.com/2072-4292/6/12/12789)
Supplement: s1 [file s1]

*Supplementary Information*

**Complementarity of Two Rice Mapping Approaches:  
Characterizing Strata Mapped by Hypertemporal MODIS  
and Rice Paddy Identification Using Multitemporal SAR.  
*Remote Sens.* 2014, 6, 12789–12814**

**Sonia Asilo <sup>1,2,\*</sup>, Kees (C.A.J.M.) de Bie <sup>1</sup>, Andrew Skidmore <sup>1</sup>, Andrew Nelson <sup>2</sup>,  
Massimo Barbieri <sup>3</sup> and Aileen Maunahan <sup>2</sup>**

<sup>1</sup> Faculty of Geo-Information and Earth Observation (ITC), University of Twente, Enschede 7500 AE, The Netherlands; E-Mails: c.a.j.m.debie@utwente.nl (K.C.A.J.M.D.B.); a.k.skidmore@utwente.nl (A.S.)

<sup>2</sup> International Rice Research Institute (IRRI), Los Baños 4031, Philippines; E-Mails: a.nelson@irri.org (A.N.); a.maunahan@irri.org (A.M.)

<sup>3</sup> sarmap, Purasca 6989, Switzerland; E-Mail: mbarbieri@sarmap.ch

\* Author to whom correspondence should be addressed; E-mail: s.asilo@utwente.nl; Tel.: +31-53-4874-516; Fax: +31-53-4874-388.

External Editors: Yoshio Inoue and Prasad S. Thenkabail

*Received: 30 August 2014; in revised form: 30 November 2014 / Accepted: 15 December 2014 /*

*Published: 22 December 2014*

---

Supplementary Material

Figure S1. Farmers’ interview and field observation questionnaire.

**Survey Questionnaire for Characterization and Mapping of Rice Areas**

Target point ID: \_\_\_\_\_ Point ID: \_\_\_\_\_ Province: \_\_\_\_\_  
 Dist. to target: \_\_\_\_\_ m Direction: \_\_\_\_\_ Municipality: \_\_\_\_\_  
 Pt. Latitude: \_\_\_\_\_ Barangay: \_\_\_\_\_  
 Pt. Longitude: \_\_\_\_\_ Date (m/d/y): \_\_\_\_\_ Start time: \_\_\_\_\_ End time: \_\_\_\_\_  
 Elevation: \_\_\_\_\_ Accuracy: \_\_\_\_\_ Collector: \_\_\_\_\_  
 Photo ID: \_\_\_\_\_ Photo coord: Lat: \_\_\_\_\_ Long: \_\_\_\_\_

**Part 1. Observation**

1.1. Land Cover (LC):  Rice  Mixed (Rice and Non-rice)  Non-rice planted rice before? \_\_\_\_\_  
 end of rice planting \_\_\_\_\_

1.1a. Describe area in detail and estimate the percentage of LC:

| Non-rice    | % LC w/in 100m | % LC w/in 250m | Description of area |
|-------------|----------------|----------------|---------------------|
| 1.          |                |                |                     |
| 2.          |                |                |                     |
| 3.          |                |                |                     |
| <b>Rice</b> |                |                |                     |

Note: Non-rice pertains to areas such as: built-up, water, forest, orchard and other vegetation that does not have paddies. If this is the case END OF SURVEY. If rice, proceed with interview.

1.2. Agri-related structures:  bunds  terraces  irrig. canal \_\_\_\_\_  dikes  pond  
 river/stream  pump  tubewell  deep well  others: \_\_\_\_\_

1.3. Terrain:  flat  undulating  hilly

---

**Part 2. Field work for CSK acquisition (Observation)**

2.1. For RICE only:

Land preparation (describe field) \_\_\_\_\_

Crop establishment: Planting distance (cm) \_\_\_\_\_ x \_\_\_\_\_ x \_\_\_\_\_  
 water depth: \_\_\_\_\_  
 Plant height: \_\_\_\_\_

Crop growth stage:

Vegetative:  Emergence  Seedling  Tillering (early, mid, late)  
 Reproductive:  Panicle initiation  Booting  Heading  Flowering  
 Ripening:  Milking  Grain filling  Maturity  Harvesting  
 Other: \_\_\_\_\_

2.2. Close up photo ID: \_\_\_\_\_

2.3. Current weather condition:  Rainy  Cloudy  Sunny  Windy  
 Other condition, pls. specify: \_\_\_\_\_

2.4. Collect GPS coordinates of field corners:

| Point ID | Latitude | Longitude | Point ID | Latitude | Longitude |
|----------|----------|-----------|----------|----------|-----------|
|          |          |           |          |          |           |
|          |          |           |          |          |           |
|          |          |           |          |          |           |

Draw the GPSed field:

Figure S1. Cont.

**Part 3. Farmer's interview**

**3.3. Planted crops** (will serve as a check if we still need to proceed. If NON-RICE, stop! End of interview)

| Crop          | 2009 | 2010 | 2011 |
|---------------|------|------|------|
| 1st crop (WS) |      |      |      |
| 2nd crop      |      |      |      |
| 3rd crop      |      |      |      |
| 4th crop      |      |      |      |

Note: If no rice is planted, end of survey. We are only interested in rice-based ecosystem that is still rice area at present. For areas that planted rice before, ask when was the last time they planted rice.

**If RICE-based:**

3.1. Ecosystem:  Irrigated  Rainfed lowland  Rainfed Upland

3.2. If irrigated, water in the field (2011):

| Cropping      | Water source  |              |      | Is irrigation water available? |    | If No |     |
|---------------|---------------|--------------|------|--------------------------------|----|-------|-----|
|               | Surface water | Ground water | Rain | Yes                            | No | When  | Why |
| 1st crop (WS) |               |              |      |                                |    |       |     |
| 2nd crop      |               |              |      |                                |    |       |     |
| 3rd crop      |               |              |      |                                |    |       |     |
| 4th crop      |               |              |      |                                |    |       |     |

3.2a. Was there a time that you didn't receive irrigation water (from 2010 backwards)?  Yes when: \_\_\_\_\_  No

**3.3. Crop establishment (2011)**

| Cropping      | Crop establishment |                |             | Age of seedling at transplanting (days) | Rice variety planted (2011) |
|---------------|--------------------|----------------|-------------|-----------------------------------------|-----------------------------|
|               | Transplanting      | Direct seeding | Dry seeding |                                         |                             |
| 1st crop (WS) |                    |                |             |                                         |                             |
| 2nd crop      |                    |                |             |                                         |                             |
| 3rd crop      |                    |                |             |                                         |                             |
| 4th crop      |                    |                |             |                                         |                             |

**3.4. Cropping calendar**

| Crops                     | flooding date | planting date | harvesting date |
|---------------------------|---------------|---------------|-----------------|
| 1 <sup>st</sup> crop (WS) |               |               |                 |
| 2 <sup>nd</sup> crop      |               |               |                 |
| 3 <sup>rd</sup> crop      |               |               |                 |
| 4 <sup>th</sup> crop      |               |               |                 |

**3.5. Standing water in the field (2011)**

| Cropping      | Do you have standing water all season? |    | If No, when do you drain your field? |
|---------------|----------------------------------------|----|--------------------------------------|
|               | Yes                                    | No |                                      |
| 1st crop (WS) |                                        |    |                                      |
| 2nd crop      |                                        |    |                                      |
| 3rd crop      |                                        |    |                                      |
| 4th crop      |                                        |    |                                      |

**3.6. Farmer's field:**

Actual farm size: \_\_\_\_\_ sqm (from farmer)

Actual field size: \_\_\_\_\_ sqm (GPS)

**Figure S2.** Example NDVI profiles showing the temporal signature before (red) and after (blue) application of Savitzky-Golay filter.

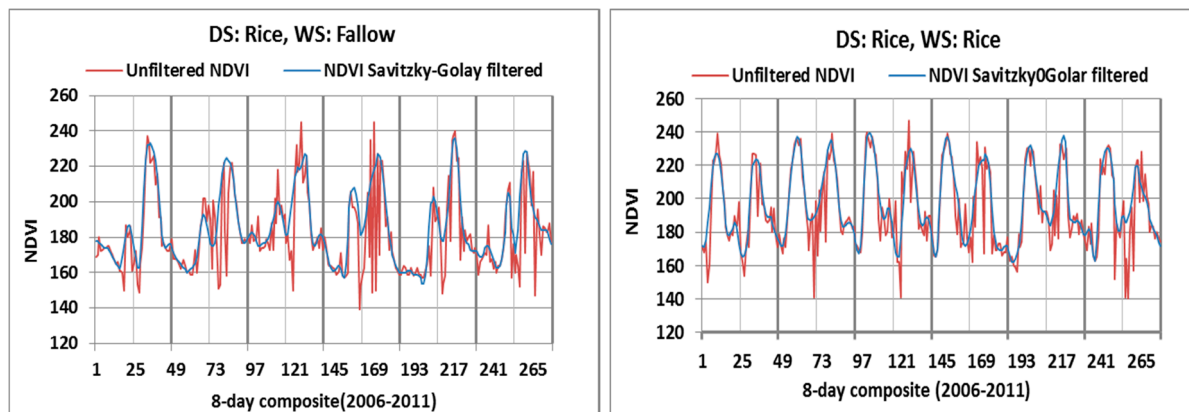

**Figure S3.** Mean NDVI temporal signature derived from MODIS (2006 to 2011) for DS and WS showing the cropping sequence in each class: (a) rice-fallow, (b) fallow-rice, (c) rice-rice and (d) other-rice.

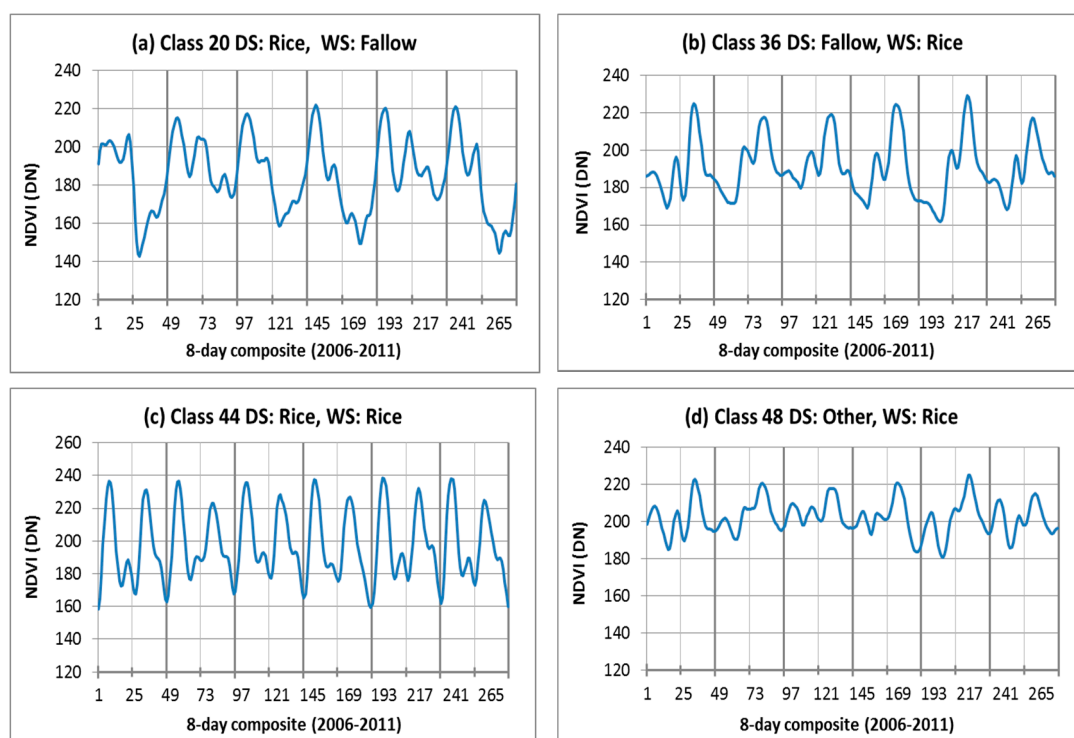

**Table S1.** Confusion matrix for the accuracy assessment of rice/non-rice areas.

| Class             | Ground Truth (Pixels) |      |       |
|-------------------|-----------------------|------|-------|
|                   | Non-rice              | Rice | Total |
| Unclassified      | 0                     | 1    | 1     |
| Non-rice          | 17                    | 8    | 25    |
| Rice              | 5                     | 78   | 83    |
| Total             | 22                    | 87   | 109   |
| Overall accuracy  | 87.2%                 |      |       |
| Kappa coefficient | 0.63                  |      |       |

**Tables S2.** Confusion matrix for the accuracy assessment rice cropping intensity.

| Class             | Ground Truth Pixels |             |          |       |
|-------------------|---------------------|-------------|----------|-------|
|                   | Double Rice         | Single Rice | Non-rice | Total |
| Unclassified      | 0                   | 1           | 0        | 1     |
| Double Rice       | 29                  | 9           | 1        | 39    |
| Single Rice       | 0                   | 17          | 4        | 21    |
| Non-rice          | 1                   | 2           | 17       | 20    |
| Total             | 30                  | 29          | 22       | 81    |
| Overall accuracy  | 77.8%               |             |          |       |
| Kappa coefficient | 0.66                |             |          |       |

**Tables S3.** Confusion matrix for the accuracy assessment cropping intensity (regardless if it rice or other crop).

| Class             | Ground Truth (Pixels) |             |             |       |
|-------------------|-----------------------|-------------|-------------|-------|
|                   | Non-rice              | Double Crop | Single crop | Total |
| Unclassified      | 0                     | 0           | 1           | 1     |
| Non-rice          | 17                    | 1           | 2           | 20    |
| Double crop       | 1                     | 39          | 2           | 42    |
| Single crop       | 4                     | 3           | 11          | 18    |
| Total             | 22                    | 43          | 16          | 81    |
| Overall accuracy  | 82.7%                 |             |             |       |
| Kappa coefficient | 0.72                  |             |             |       |

**Tables S4.** Confusion matrix for the accuracy assessment Cropping pattern.

| Class             | Ground Truth (Pixels) |             |             |                 |           |       |
|-------------------|-----------------------|-------------|-------------|-----------------|-----------|-------|
|                   | Non-rice              | Fallow-Rice | Rice-Fallow | Rice-Other crop | Rice-Rice | Total |
| Unclassified      | 0                     | 1           | 0           | 0               | 0         | 1     |
| Non-rice          | 17                    | 1           | 1           | 0               | 1         | 20    |
| Fallow - Rice     | 0                     | 4           | 0           | 0               | 0         | 4     |
| Rice-Fallow       | 4                     | 0           | 7           | 3               | 0         | 14    |
| Rice-Other crop   | 0                     | 0           | 0           | 10              | 4         | 14    |
| Rice-Rice         | 1                     | 2           | 0           | 0               | 25        | 28    |
| Total             | 22                    | 8           | 8           | 13              | 30        | 81    |
| Overall accuracy  | 77.8%                 |             |             |                 |           |       |
| Kappa coefficient | 0.71                  |             |             |                 |           |       |

**Tables S5.** Confusion matrix for the accuracy assessment rice ecosystem.

| Class        | Ground Truth (Pixels) |           |         |       |
|--------------|-----------------------|-----------|---------|-------|
|              | Non-rice              | Irrigated | Rainfed | Total |
| Unclassified | 0                     | 0         | 1       | 1     |
| Non-rice     | 17                    | 2         | 1       | 20    |
| Irrigated    | 1                     | 30        | 8       | 39    |
| Rainfed      | 4                     | 4         | 13      | 21    |

**Table S5.** *Cont.*

| Class             | Ground Truth (Pixels) |           |         |       |
|-------------------|-----------------------|-----------|---------|-------|
|                   | Non-rice              | Irrigated | Rainfed | Total |
| Total             | 22                    | 36        | 23      | 81    |
| Overall accuracy  | 74%                   |           |         |       |
| Kappa coefficient | 0.60                  |           |         |       |

**Tables S6.** Confusion matrix for the accuracy assessment Crop Calendar for WS.

| Class             | Ground Truth (Pixels) |         |        |     |     |       |
|-------------------|-----------------------|---------|--------|-----|-----|-------|
|                   | Non-rice              | Jun-Jul | Fallow | May | Aug | Total |
| Unclassified      | 0                     | 0       | 1      | 0   | 0   | 1     |
| Non-rice          | 17                    | 1       | 1      | 0   | 1   | 20    |
| Jun-Jul           | 4                     | 37      | 2      | 1   | 4   | 48    |
| Fallow            | 0                     | 0       | 4      | 0   | 0   | 4     |
| May-Jun           | 1                     | 2       | 0      | 1   | 0   | 4     |
| Jul-Aug           | 0                     | 2       | 0      | 0   | 2   | 4     |
| Total             | 22                    | 42      | 8      | 2   | 7   | 81    |
| Overall accuracy  | 75.3%                 |         |        |     |     |       |
| Kappa coefficient | 0.60                  |         |        |     |     |       |

**Tables S7.** Confusion matrix for the accuracy assessment Crop Calendar for DS.

| Class             | Ground Truth (Pixels) |         |        |       |         |       |
|-------------------|-----------------------|---------|--------|-------|---------|-------|
|                   | Non-rice              | Dec-Jan | Fallow | Other | Oct-Nov | Total |
| Unclassified      | 0                     | 1       | 0      | 0     | 0       | 1     |
| Non-rice          | 17                    | 2       | 1      | 0     | 0       | 20    |
| Dec-Jan           | 1                     | 15      | 0      | 0     | 0       | 16    |
| Fallow            | 4                     | 0       | 7      | 1     | 2       | 14    |
| Other             | 0                     | 3       | 0      | 10    | 1       | 14    |
| Oct-Nov           | 0                     | 15      | 0      | 0     | 1       | 16    |
| Total             | 22                    | 36      | 8      | 11    | 4       | 81    |
| Overall accuracy  | 61.7%                 |         |        |       |         |       |
| Kappa coefficient | 0.52                  |         |        |       |         |       |

**Tables S8.** Confusion matrix for the accuracy assessment SAR-derived rice area.

| Class             | Ground Truth (Pixels) |          |       |
|-------------------|-----------------------|----------|-------|
|                   | Rice                  | Non-rice | Total |
| Unclassified      | 0                     | 0        | 0     |
| Rice              | 176                   | 5        | 181   |
| Non-rice          | 18                    | 41       | 59    |
| Total             | 194                   | 46       | 240   |
| Overall accuracy  | 90.4%                 |          |       |
| Kappa coefficient | 0.72                  |          |       |

**Figure S4.** The Terra SAR-X image on the left was acquired on 6 July 2013. It contains the assumed intense localized clouds and rain. The image on the right was acquired on 23 September 2013. It shows what the image looks like without the intense localized weather events. The affected images were corrected and used afterward.

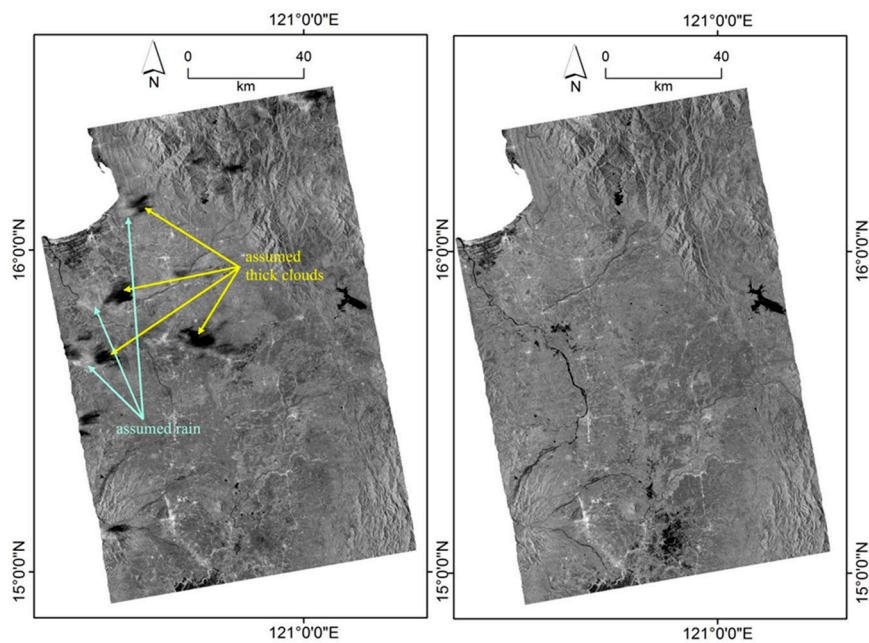

© 2014 by the authors; licensee MDPI, Basel, Switzerland. This article is an open access article distributed under the terms and conditions of the Creative Commons Attribution license (<http://creativecommons.org/licenses/by/4.0/>).
